# Supplementary material
Source: publisher figshare collection journal article supplement (https://gsapubs.figshare.com/ndownloader/files/31330234)
Supplement: Supplementary file 1 [file 31330234]

Garde, A.A., Keulen, N., and Waight, T., 2021, Microporphyritic and microspherulitic melt grains, Hiawatha crater, Northwest Greenland: Implications for post-impact cooling rates, hydration, and the cratering environment: GSA Bulletin, <https://doi.org/10.1130/B36058.1>.

## Supplemental Material

**Table S1.** EMP analyses of Hiawatha melt grains, detrital minerals and EMP standards, and compositions of reference points shown in Figure 15.

**Figure S1.** Felsic melt grain 21J-t03 with mordenite microspherulites and perlitic fractures. **(A–C)** SEM-BSE and optical images. Note cloudy microspherulitic bodies, curved perlitic fractures with alteration and late open fractures. **(D)** SEM-EDS composition map of indexed melt, quartz fragments, schlieric (presumably partly melted) feldspar fragments and alteration products. Felsic microspherulitic melt areas predominate, indexed as mordenite and Si-Al glass. Soft mesostasis partially removed by polishing, enhancing the microspherulitic structure. Perlitic fractures are lined with complex Fe-Mg-rich, phyllosilicate-bearing alteration zones. Elongate chloritic areas are interpreted as former vesicles (arrows). **(E–L)** Enlarged BSE image, indexed composition and element maps. Micro-spherulites and mesostasis are best distinguished in the BSE image, the Al map and the map of 5–10% Al on black background **(E, I, J)**. All element maps in element weight percent.

**Figure S2.** Felsic melt grain 21J-z40 with microspherulitic mordenite, fragments of quartz and plagioclase as well as perlitic fractures with hydrothermal alteration. Mordenite microspherulites mixed with Al-Si glass predominate. **(A, B)** Optical and SEM-BSE images. **(C):** SEM-EDS composition map with indexed melt, mineral fragments and alteration products. **(E–K)** Enlarged maps within white frame in **C**. Microspherulitic structure clearly visible in **E** and **J** (BSE and Ca maps). Thin but complex hydrothermal alteration zones have Al and K enrichment and Ca depletion, and Fe enrichment and Si depletion in their centers. All element maps in element weight percent.

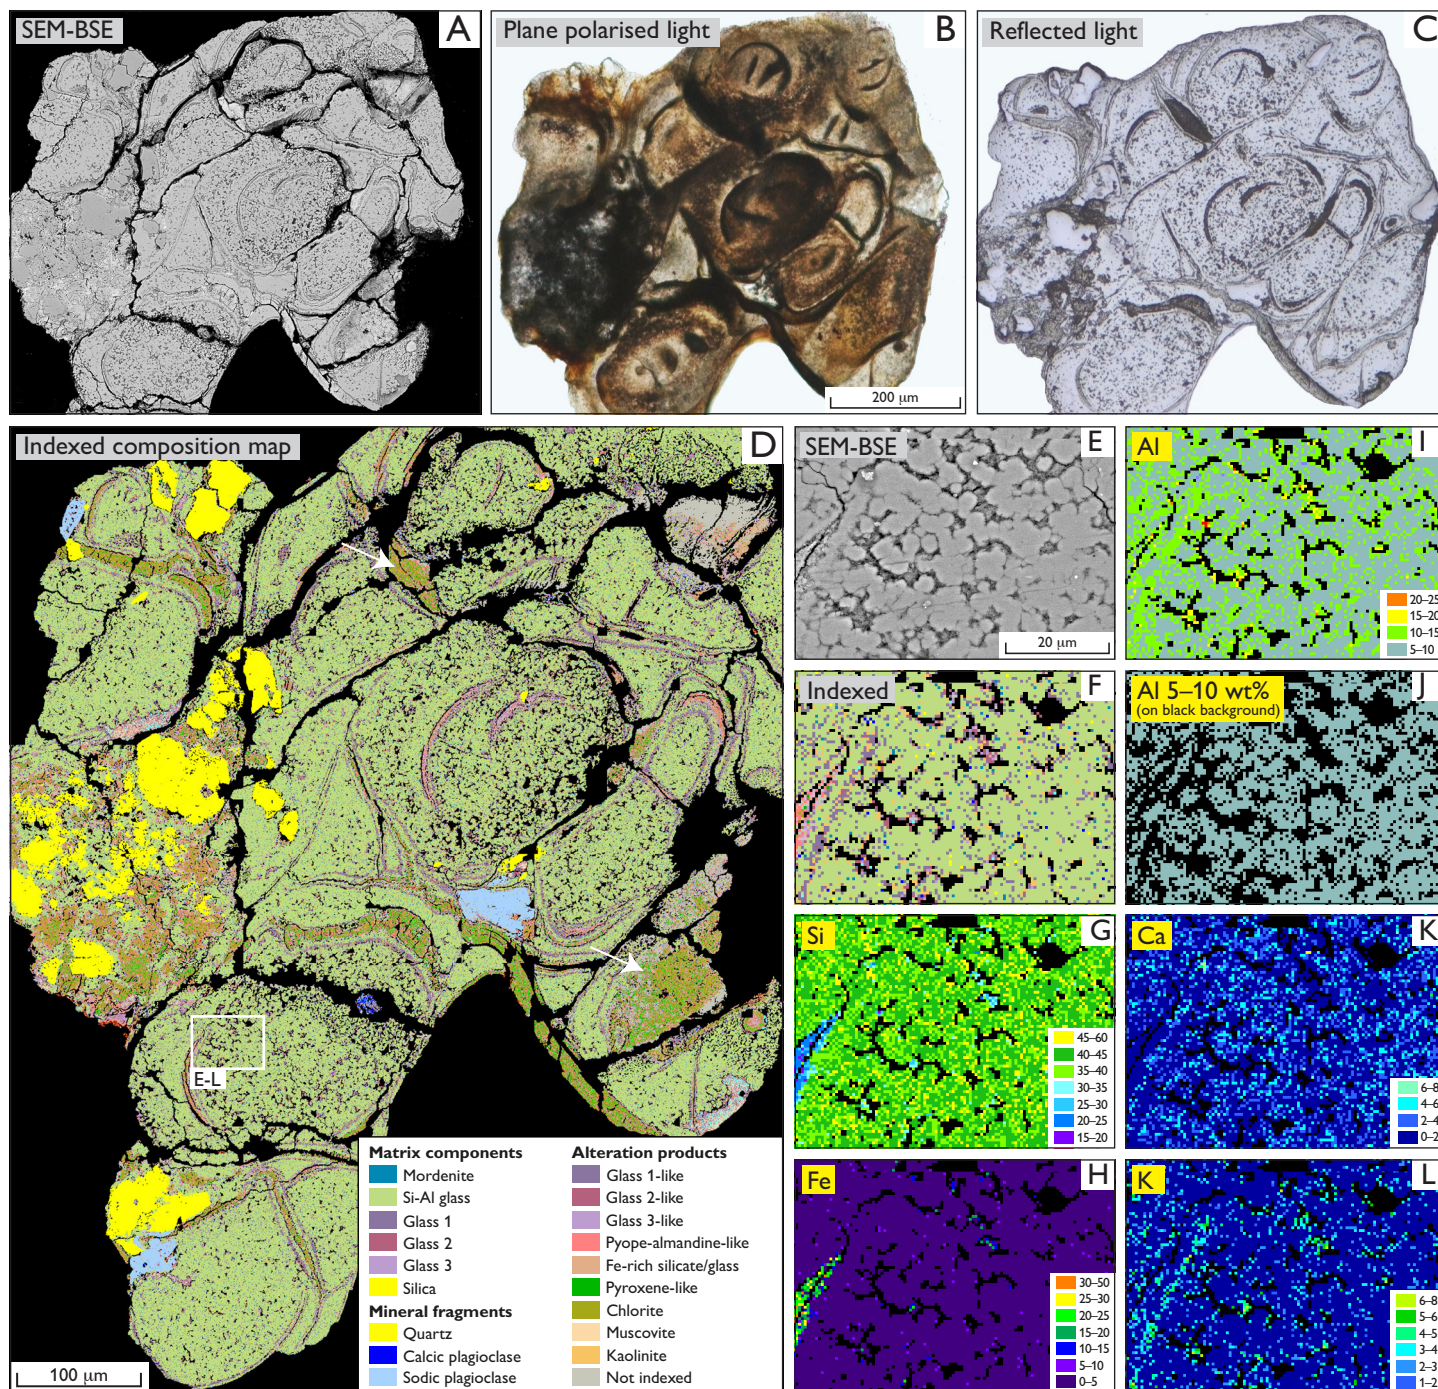

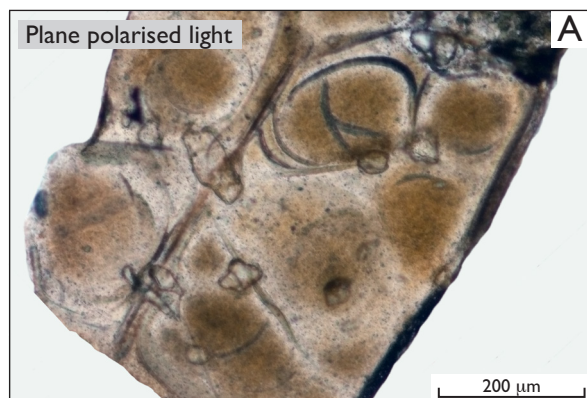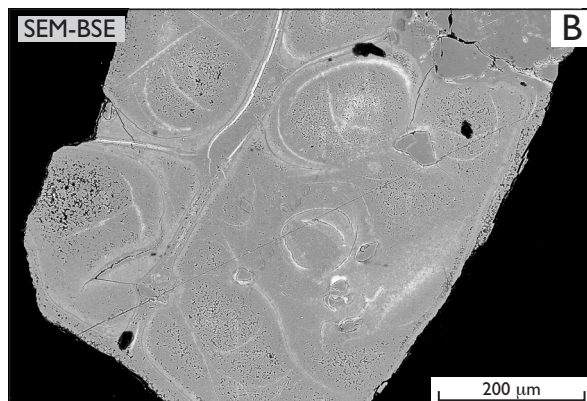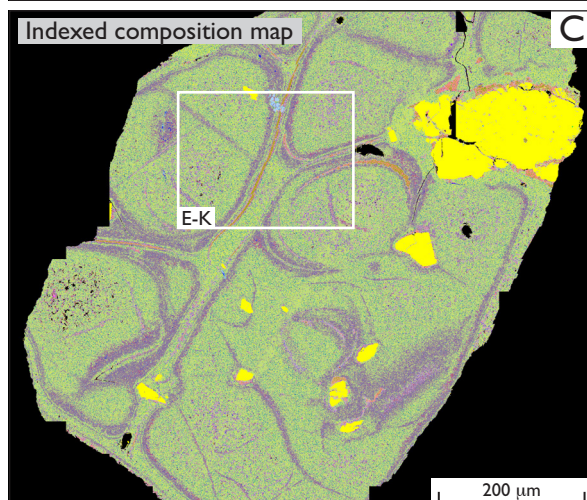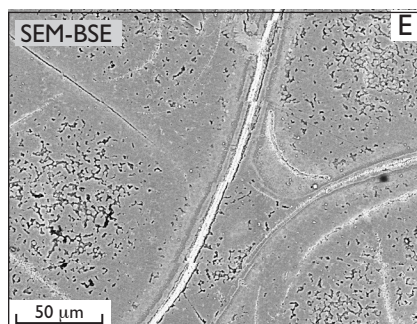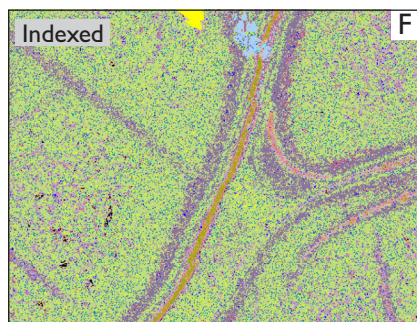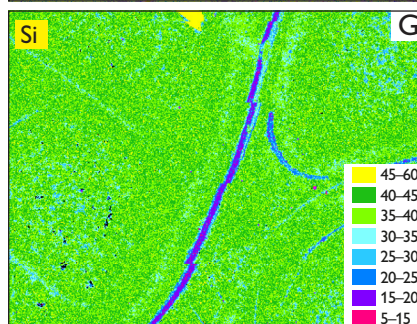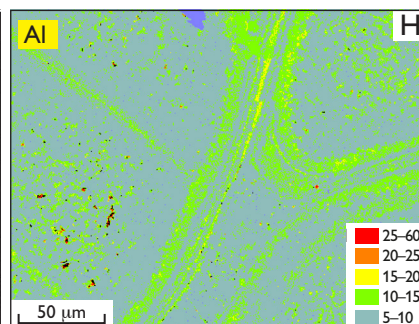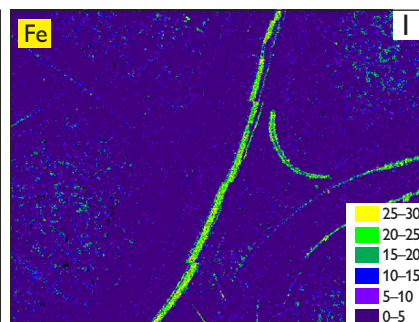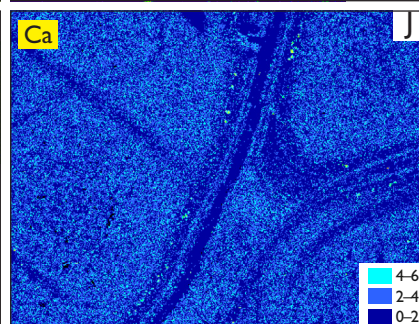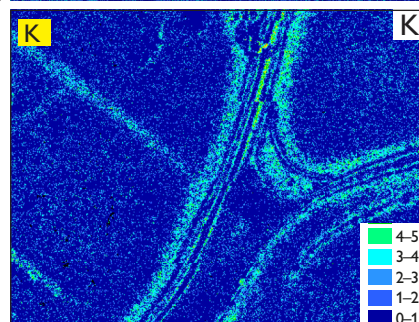

| Matrix components  | Alteration products   |
|--------------------|-----------------------|
| Mordenite          | Chlorite              |
| Si-Al glass        | Muscovite             |
| Glass 1            | Kaolinite             |
| Glass 2            | Glass 1-like          |
| Glass 3            | Glass 2-like          |
| Silica             | Glass 3-like          |
|                    | Pyrope-almandine-like |
| Mineral fragments  |                       |
| Quartz             |                       |
| Sodic plagioclase  |                       |
| Calcic plagioclase |                       |
